# Supplementary material for: Doubly Bayesian Analysis of Confidence in Perceptual Decision-Making
Source: PubMed Central journal article supplement (PMC4627723; doi:10.1371/journal.pcbi.1004519), 2015-10-30
Supplement: pcbi.1004519.s001.pdf [file pcbi.1004519.s001.pdf]

| Participant | $\sigma$ | $b$   | Model      |
|-------------|----------|-------|------------|
| 1           | 0.087    | 0.016 | Difference |
| 2           | 0.057    | 0.063 | Difference |
| 3           | 0.067    | 0.021 | Difference |
| 4           | 0.072    | 0.033 | Difference |
| 5           | 0.074    | 0.007 | Difference |
| 6           | 0.087    | 0.001 | Difference |
| 7           | 0.075    | 0.003 | Difference |
| 8           | 0.091    | 0.011 | Difference |
| 9           | 0.067    | 0.026 | Difference |
| 10          | 0.159    | 0.003 | Difference |
| 11          | 0.068    | 0.003 | Difference |
| 12          | 0.061    | 0.015 | Difference |
| 13          | 0.091    | 0.004 | Difference |
| 14          | 0.050    | 0.004 | Difference |
| 15          | 0.128    | 0.004 | Difference |
| 1           | 0.099    | 0.004 | Max        |
| 2           | 0.072    | 0.021 | Max        |
| 3           | 0.076    | 0.006 | Max        |
| 4           | 0.092    | 0.007 | Max        |
| 5           | 0.086    | 0.005 | Max        |
| 6           | 0.096    | 0.002 | Max        |
| 7           | 0.089    | 0.001 | Max        |
| 8           | 0.105    | 0.004 | Max        |
| 9           | 0.082    | 0.015 | Max        |
| 10          | 0.150    | 0.001 | Max        |
| 11          | 0.080    | 0.002 | Max        |
| 12          | 0.077    | 0.001 | Max        |
| 13          | 0.112    | 0.001 | Max        |
| 14          | 0.060    | 0.002 | Max        |
| 15          | 0.144    | 0.002 | Max        |
| 1           | 0.094    | 0.001 | Bayesian   |
| 2           | 0.066    | 0.041 | Bayesian   |
| 3           | 0.077    | 0.017 | Bayesian   |
| 4           | 0.083    | 0.059 | Bayesian   |
| 5           | 0.082    | 0.011 | Bayesian   |
| 6           | 0.095    | 0.002 | Bayesian   |
| 7           | 0.085    | 0.008 | Bayesian   |
| 8           | 0.107    | 0.019 | Bayesian   |
| 9           | 0.082    | 0.001 | Bayesian   |
| 10          | 0.136    | 0.002 | Bayesian   |
| 11          | 0.075    | 0.002 | Bayesian   |
| 12          | 0.073    | 0.002 | Bayesian   |
| 13          | 0.100    | 0.002 | Bayesian   |
| 14          | 0.058    | 0.002 | Bayesian   |
| 15          | 0.143    | 0.005 | Bayesian   |
